# Supplementary material for: Design, synthesis and biological evaluation of a novel PSMA–PI3K small molecule drug conjugate
Source: Royal Society of Chemistry journal article supplement (doi:10.1039/d4md00246f), 2024-01-01

## Supplementary Information

### Design, Synthesis and Biological Evaluation of a Novel PSMA-PI3K Small Molecule Drug Conjugate

Shouguo Peng<sup>a,b,c</sup>, Haixia Li<sup>d</sup>, Weilu Cui<sup>d</sup>, Tianning Xiong<sup>a,b,c</sup>, Jiaqi Hu<sup>a,b,c</sup>, Haixiang Qi<sup>a,b,c</sup>, Songwen Lin<sup>a,b,c</sup>, Deyu Wu<sup>a,b,c</sup>, Ming Ji<sup>a,c,\*</sup>, Heng Xu<sup>a,b,c,\*</sup>

<sup>a</sup>*State Key Laboratory of Bioactive Substance and Function of Natural Medicines, Institute of Materia Medica, Chinese Academy of Medical Sciences and Peking Union Medical College, Beijing, 100050, China.*

<sup>b</sup>*Beijing Key Laboratory of Active Substances Discovery and Druggability Evaluation, Institute of Materia Medica, Chinese Academy of Medical Sciences and Peking Union Medical College, Beijing, 100050, China.*

<sup>c</sup>*CAMS Key Laboratory of Small Molecule Immuno-Oncology Drug Discovery, Chinese Academy of Medical Sciences, Beijing, 100050, China.*

<sup>d</sup>*Guang'anmen Hospital, China Academy of Chinese Medical Sciences, Beijing, 100053, China*

\* E-mails: jiming@imm.ac.cn; xuheng@imm.ac.cn

# $^1\text{H}/^{13}\text{C}$ NMR, LCMS and HRMS Spectra of Key Compounds

## Compound 3

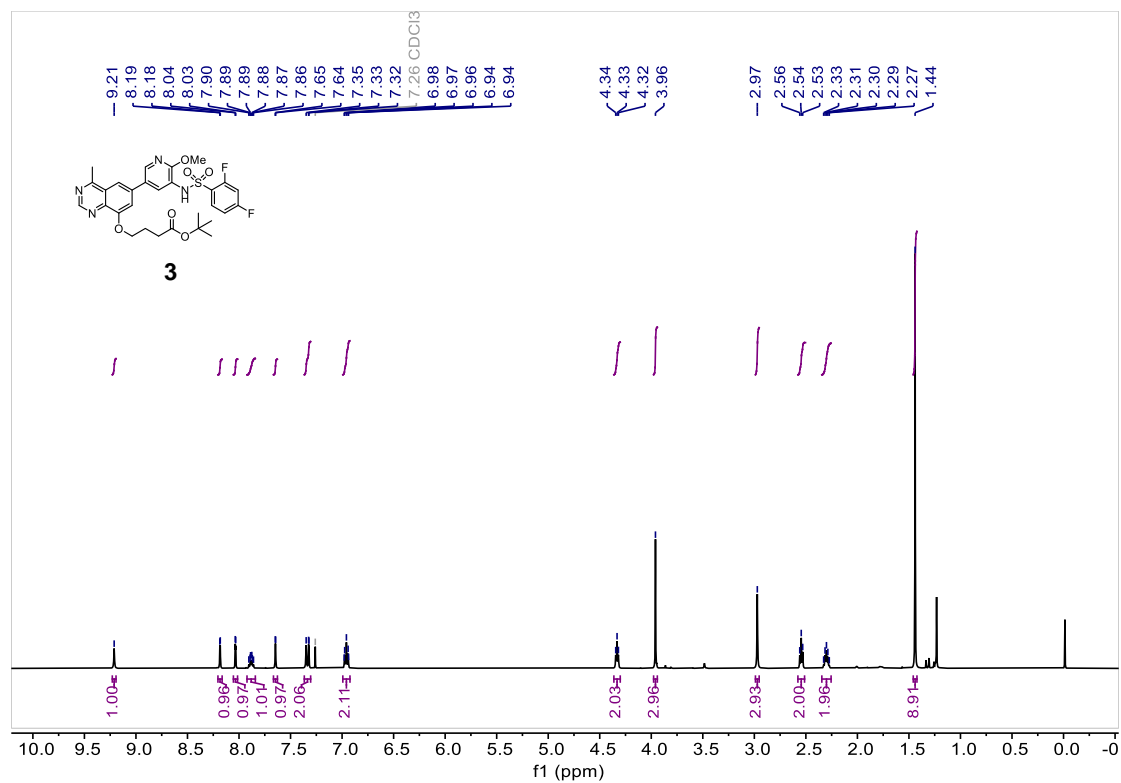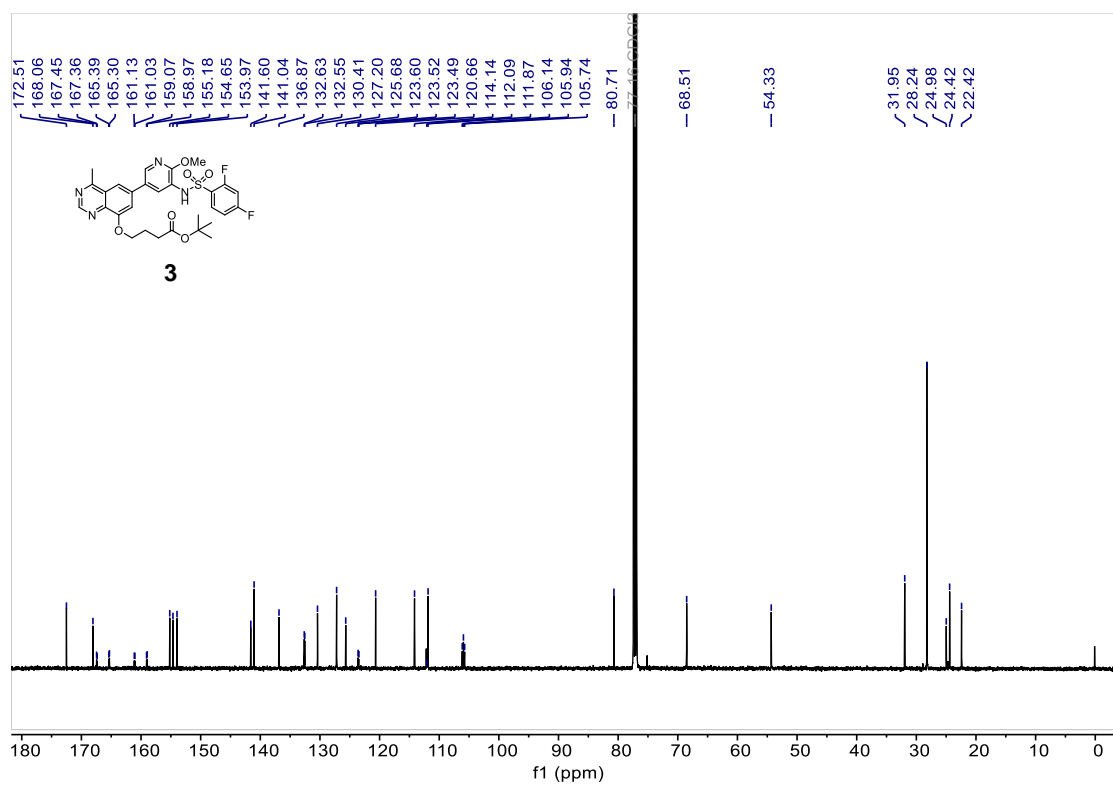

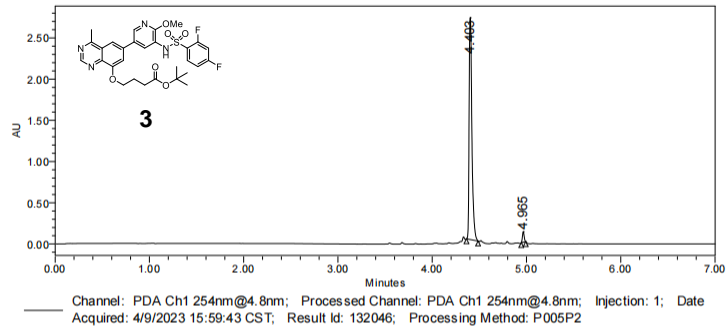

**Peak Name:**

|           | Injection | RT    | Area    | % Area |
|-----------|-----------|-------|---------|--------|
| 1         | 1         | 4.965 | 164428  | 2.89   |
| 2         | 1         | 4.403 | 5516323 | 97.11  |
| Mean      |           | 4.684 |         |        |
| Std. Dev. |           | 0.398 |         |        |
| % RSD     |           | 8.49  |         |        |

P05-1 #1450-1603 RT: 4.82-5.32 AV: 154 NL: 1.71E8  
T: FTMS + p ESI Full ms [100.0000-1500.0000]

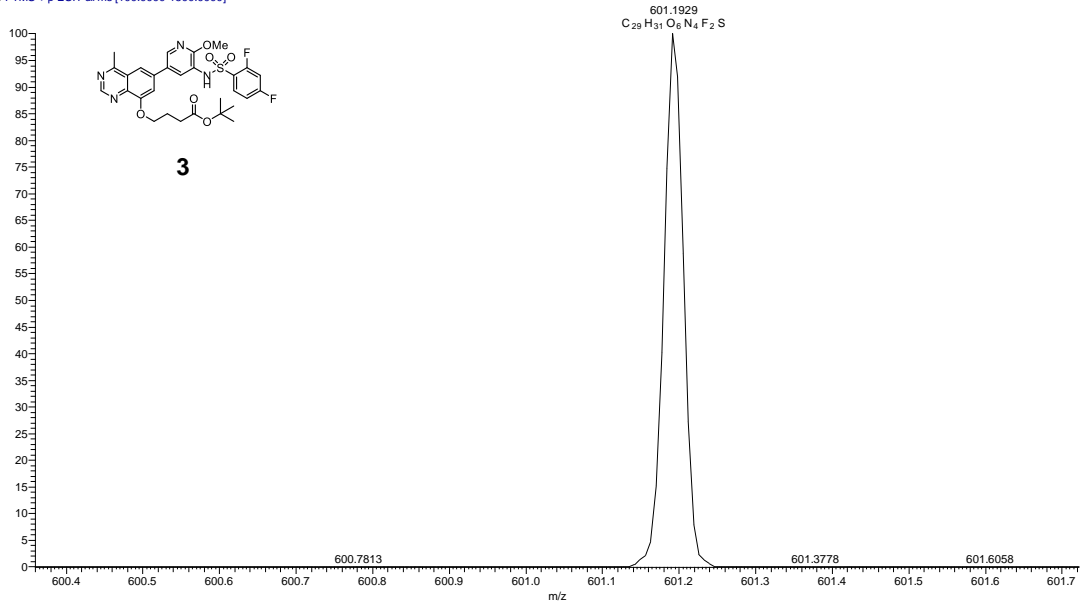

Compound 4

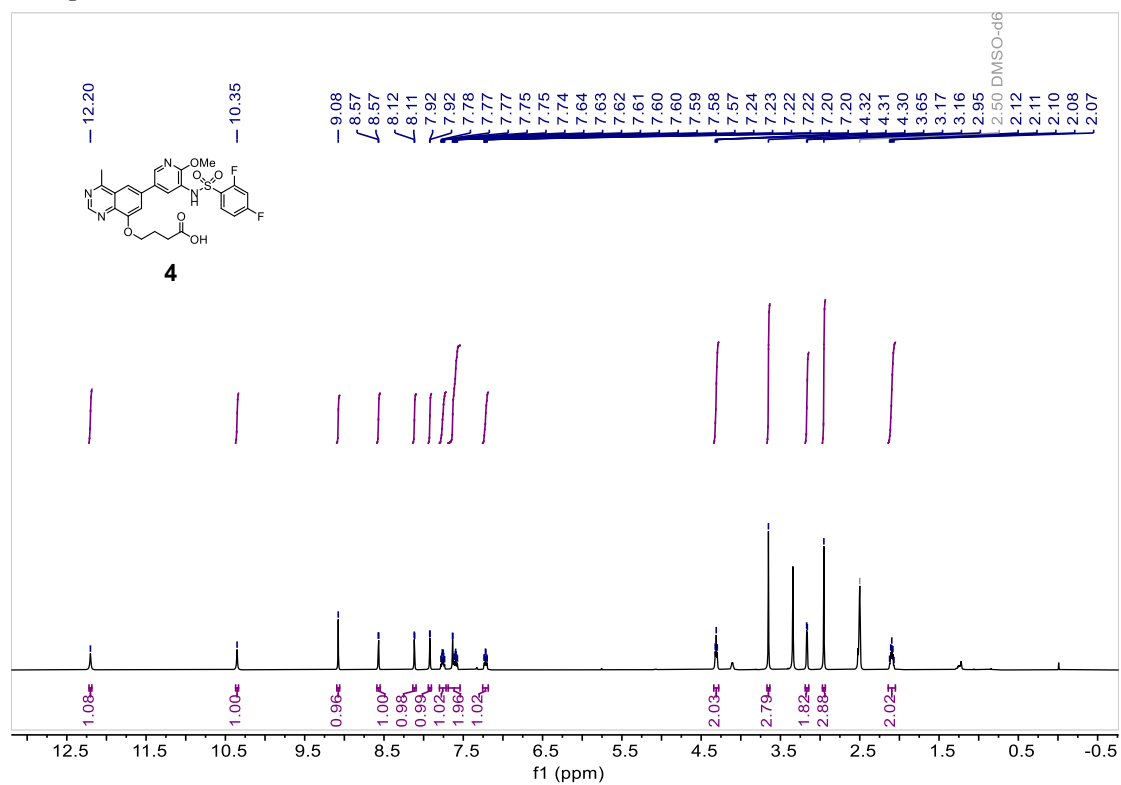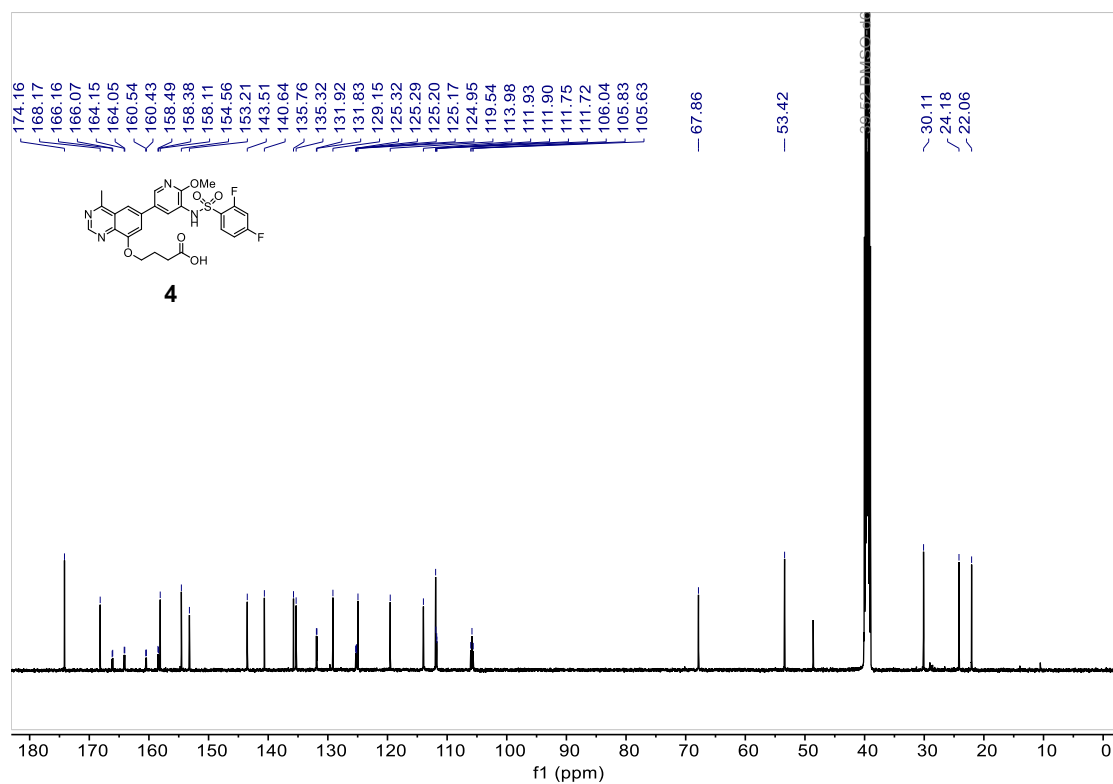

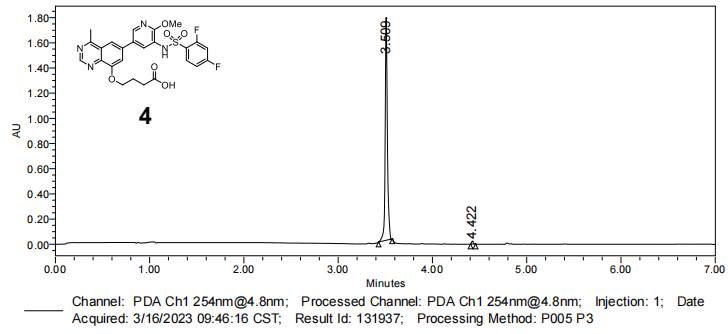

**Peak Name:**

|           | Injection | RT    | Area    | % Area |
|-----------|-----------|-------|---------|--------|
| 1         | 1         | 4.422 | 29497   | 1.00   |
| 2         | 1         | 3.509 | 2906558 | 99.00  |
| Mean      |           | 3.966 |         |        |
| Std. Dev. |           | 0.646 |         |        |
| % RSD     |           | 16.29 |         |        |

P05-1 #1754-1774 RT: 5.91-6.00 AV: 21 NL: 2.21E5  
T: FTMS + p ESI Full ms [100.0000-1500.0000]

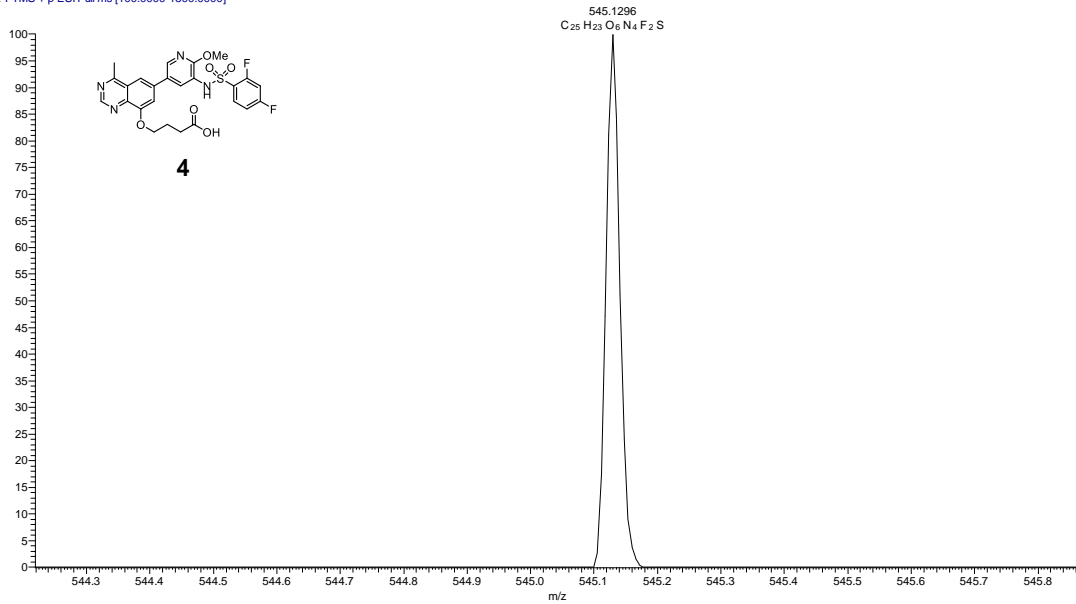



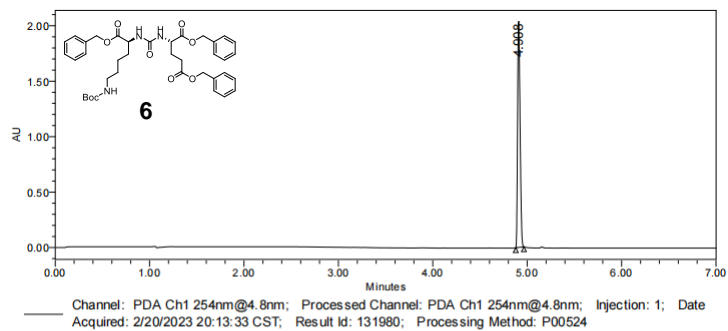

**Peak Name:**

|           | Injection | RT    | Area    | % Area |
|-----------|-----------|-------|---------|--------|
|           | 1         | 4.908 | 3729426 | 100.00 |
| Mean      |           | 4.908 |         |        |
| Std. Dev. |           |       |         |        |
| % RSD     |           |       |         |        |

P05-2 #1206-1258 RT: 5.99-6.32 AV: 53 NL: 5.24E5  
T: FTMS + p ESI Full ms [100.0000-1500.0000]

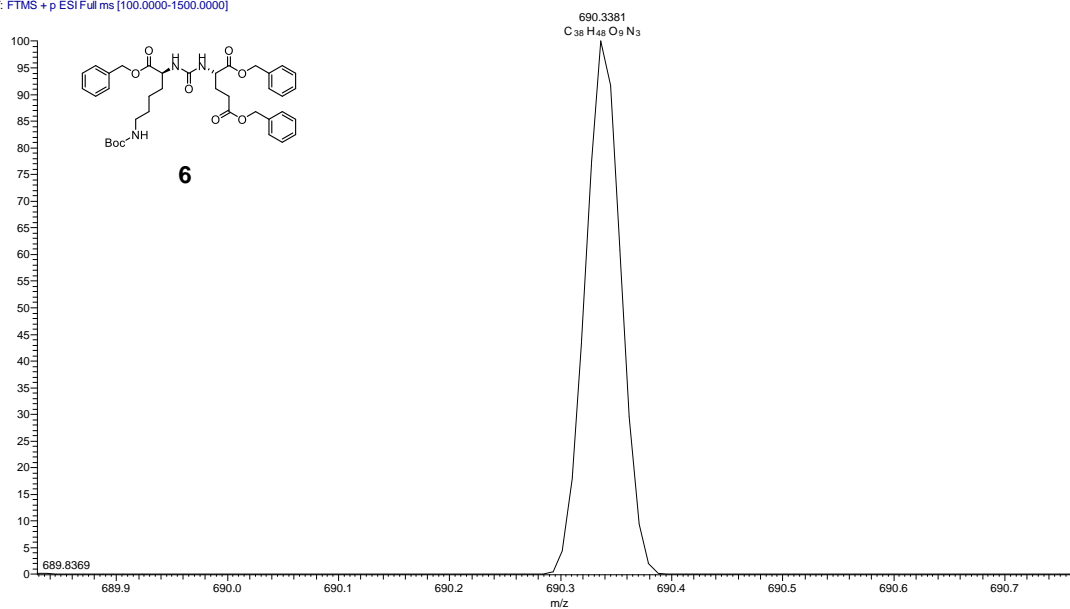

Compound 7

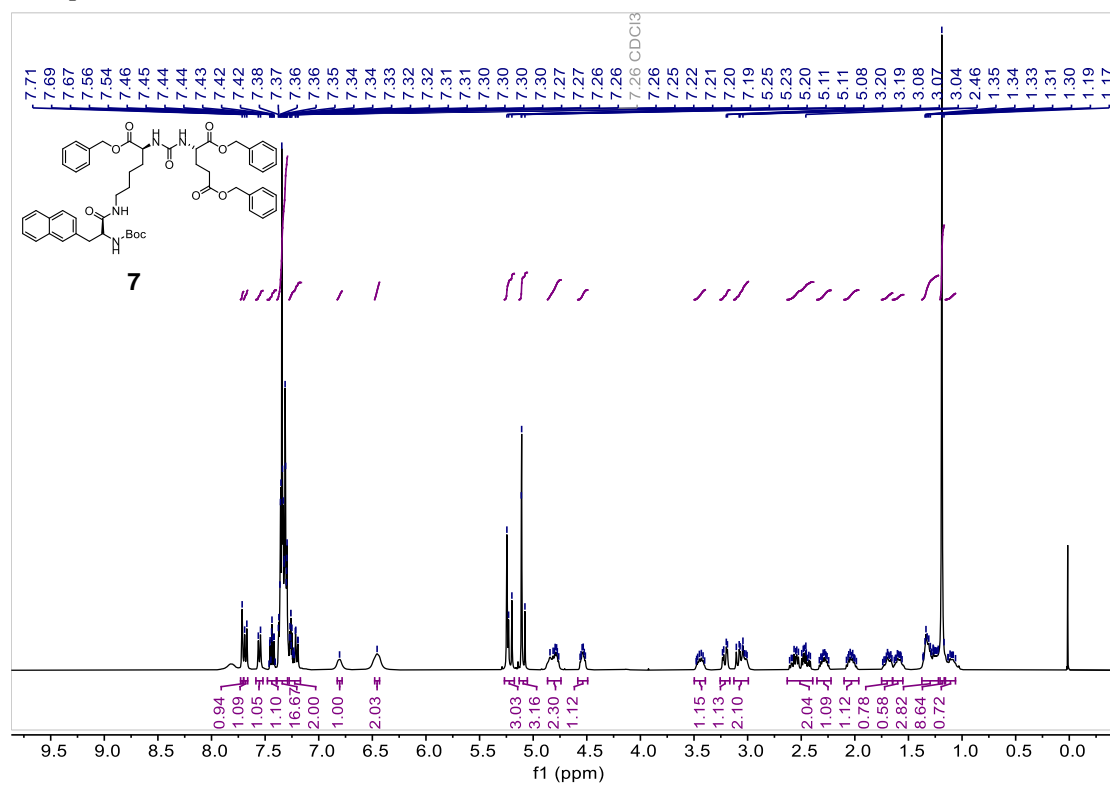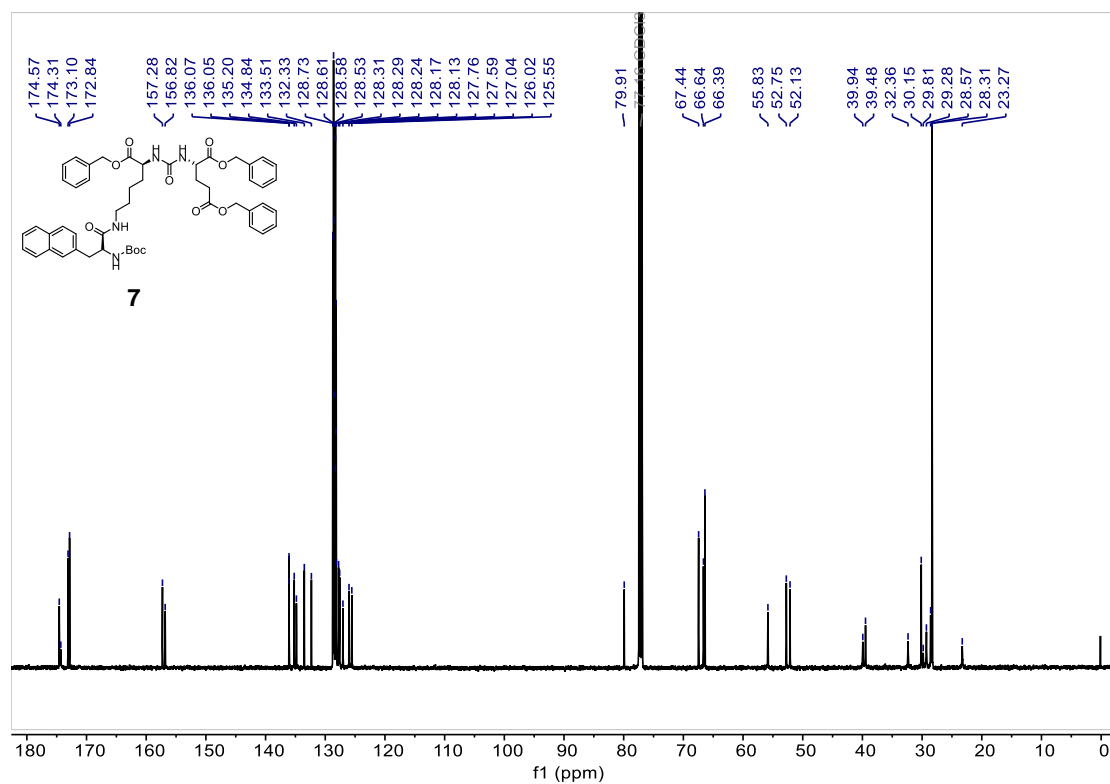



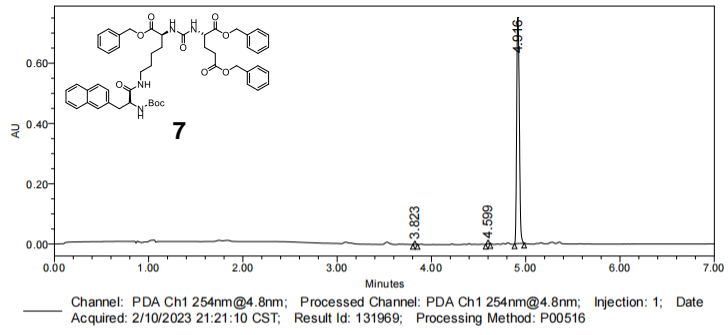

**Peak Name:**

|           | Injection | RT    | Area    | % Area |
|-----------|-----------|-------|---------|--------|
| 1         | 1         | 3.823 | 12817   | 0.85   |
| 2         | 1         | 4.916 | 1476769 | 98.03  |
| 3         | 1         | 4.599 | 16807   | 1.12   |
| Mean      |           | 4.446 |         |        |
| Std. Dev. |           | 0.562 |         |        |
| % RSD     |           | 12.65 |         |        |

P05-3 #1284-1330 RT: 6.78-7.08 AV: 47 NL: 1.56E2  
T: FTMS + p ESI Full ms [100.0000-1500.0000]

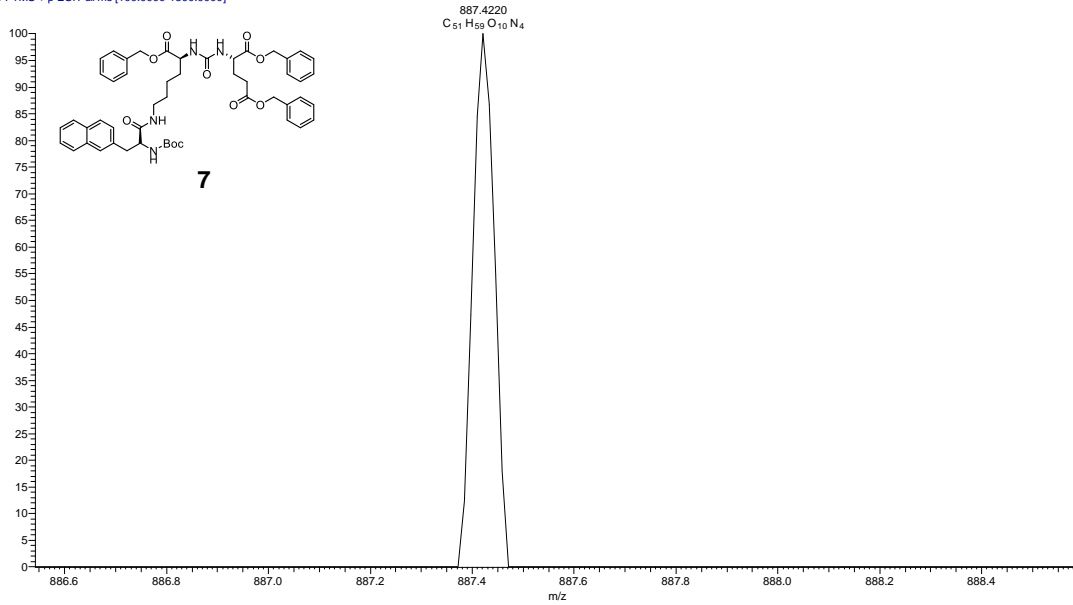

# Compound 8

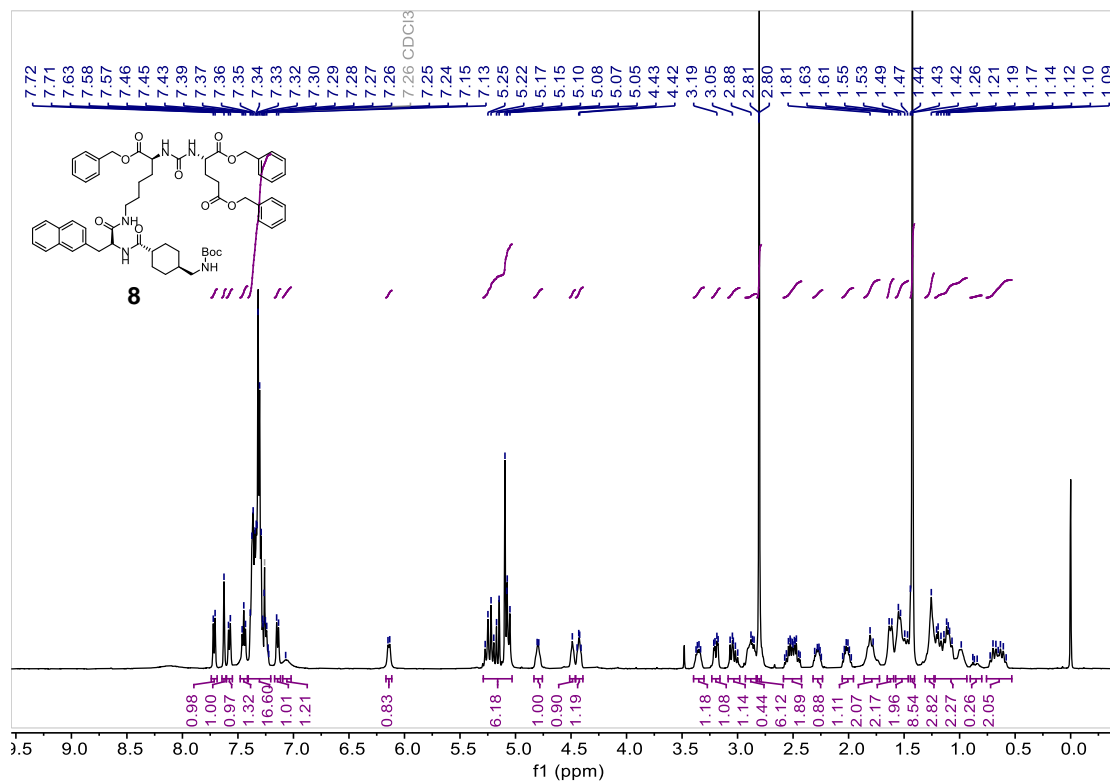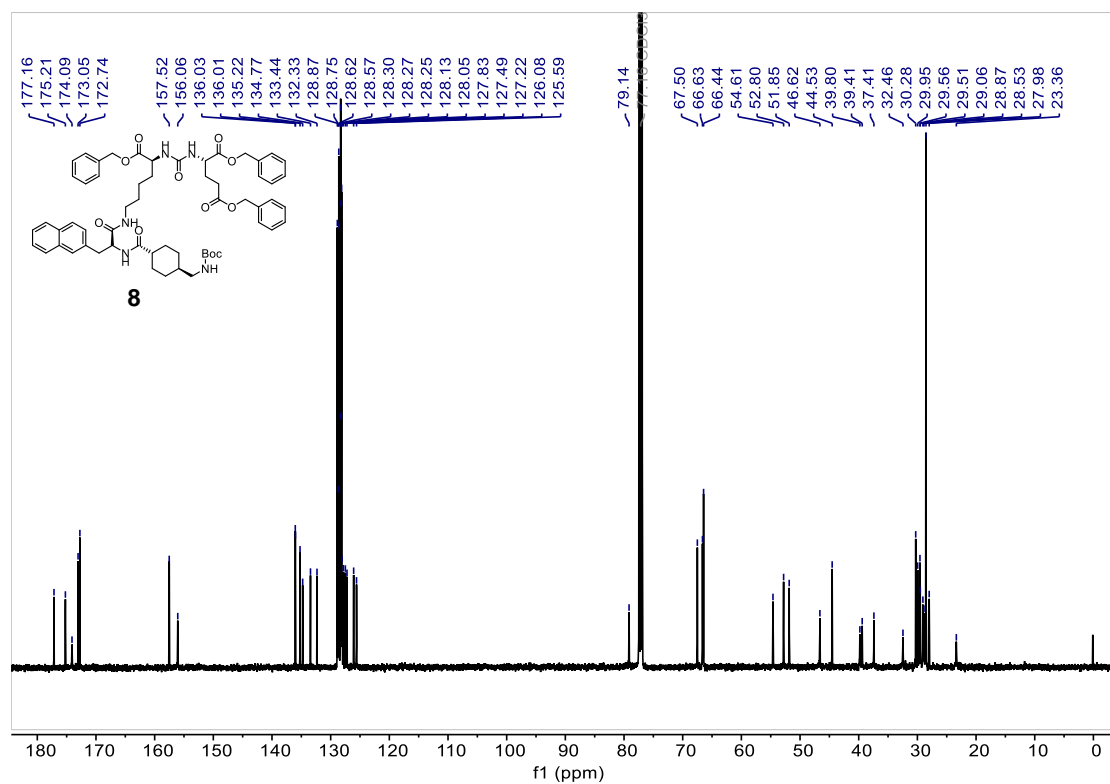

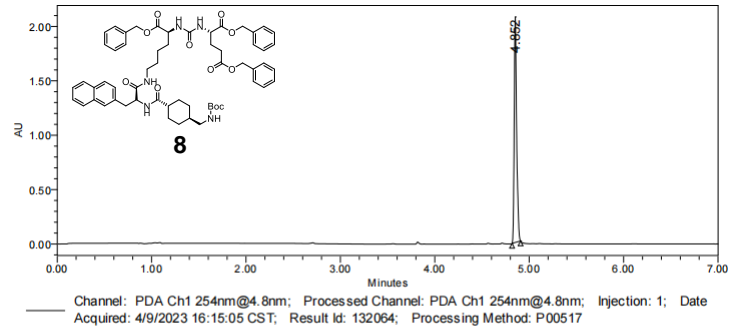

**Peak Name:**

| Injection | RT    | Area    | % Area |
|-----------|-------|---------|--------|
| 1         | 4.852 | 3678820 | 100.00 |
| Mean      | 4.852 |         |        |
| Std. Dev. |       |         |        |
| % RSD     |       |         |        |

P005-17 #915-922 RT: 5.91-5.96 AV: 8 NL: 1.72E3  
T: FTMS + p ESI Full ms [100.0000-1500.0000]

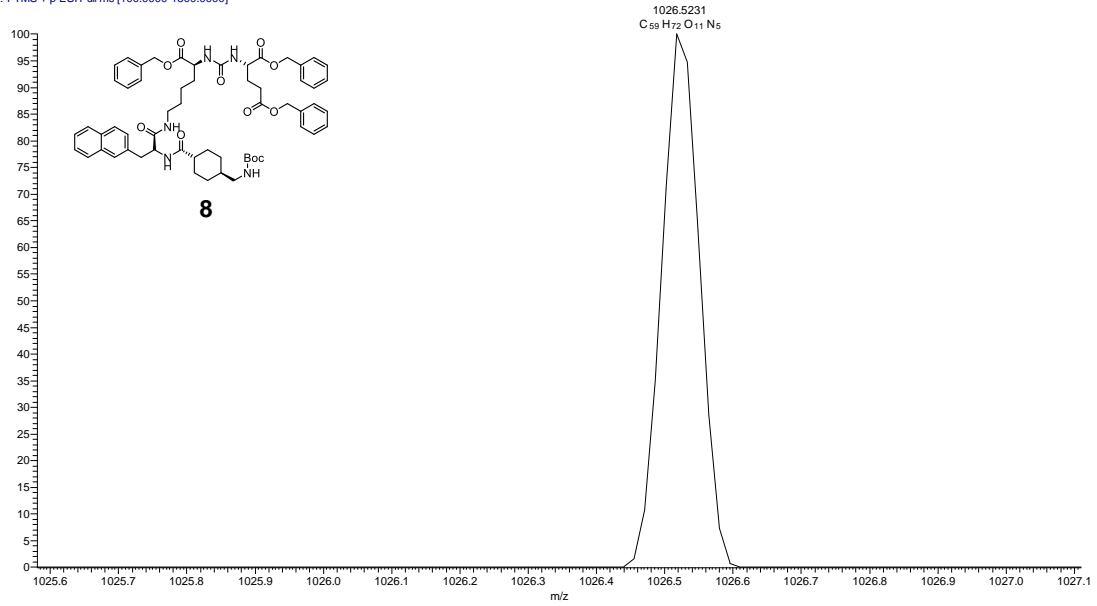

### Compound 9

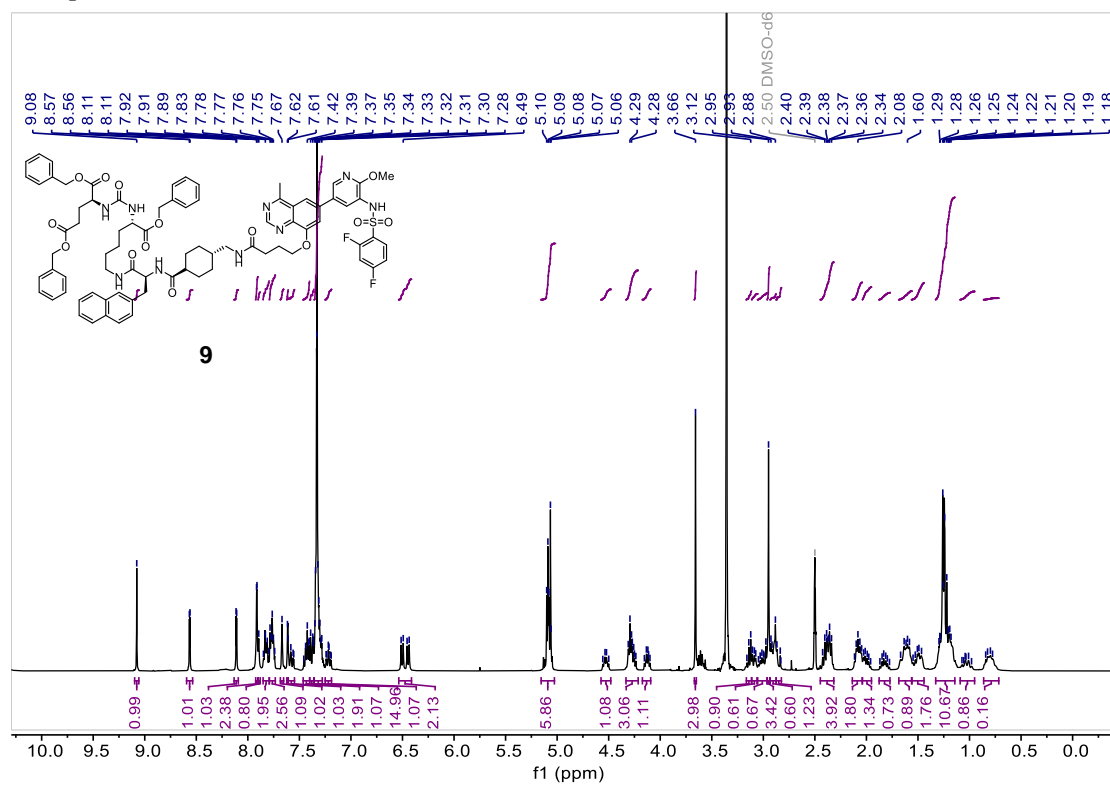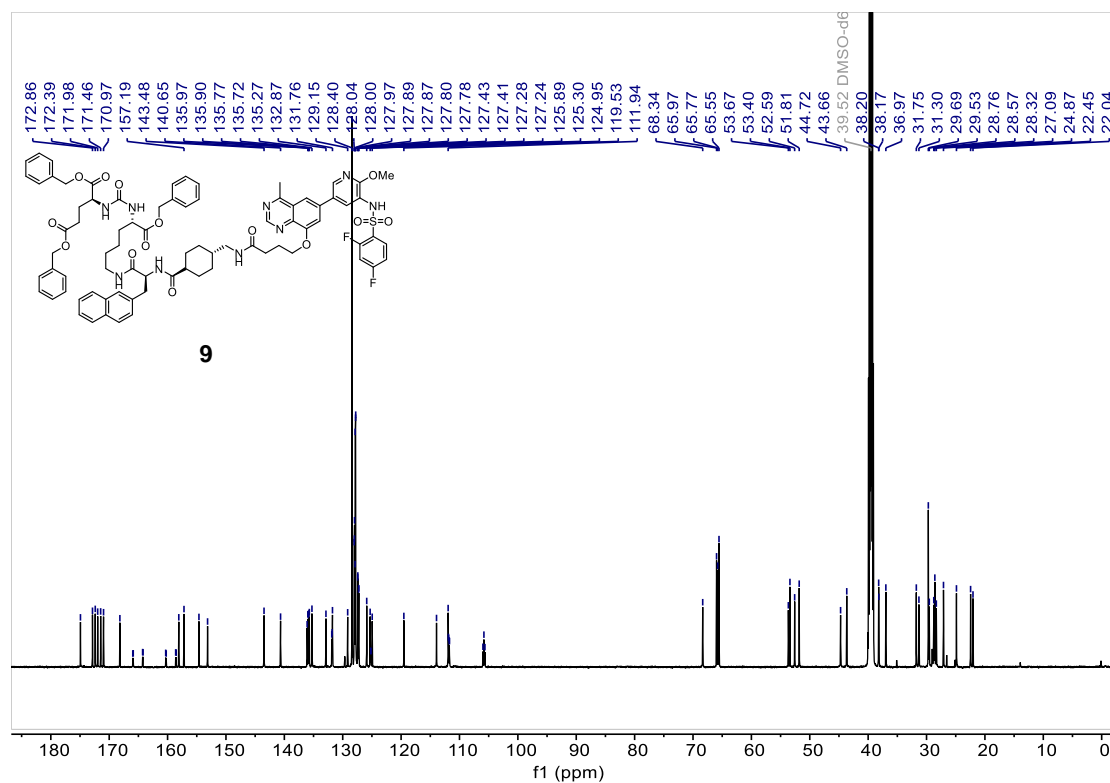

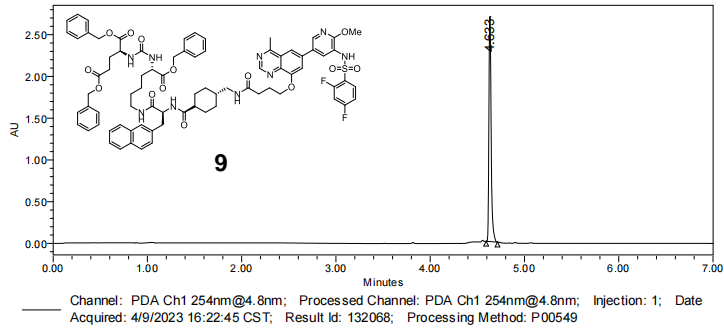

**Peak Name:**

|           | Injection | RT    | Area    | % Area |
|-----------|-----------|-------|---------|--------|
| 1         | 1         | 4.633 | 4464941 | 100.00 |
| Mean      |           | 4.633 |         |        |
| Std. Dev. |           |       |         |        |
| % RSD     |           |       |         |        |

P05-4 #1221 RT: 5.79 AV: 1 NL: 4.06E3  
T: FTMS + p ESI Full ms [100.0000-1500.0000]

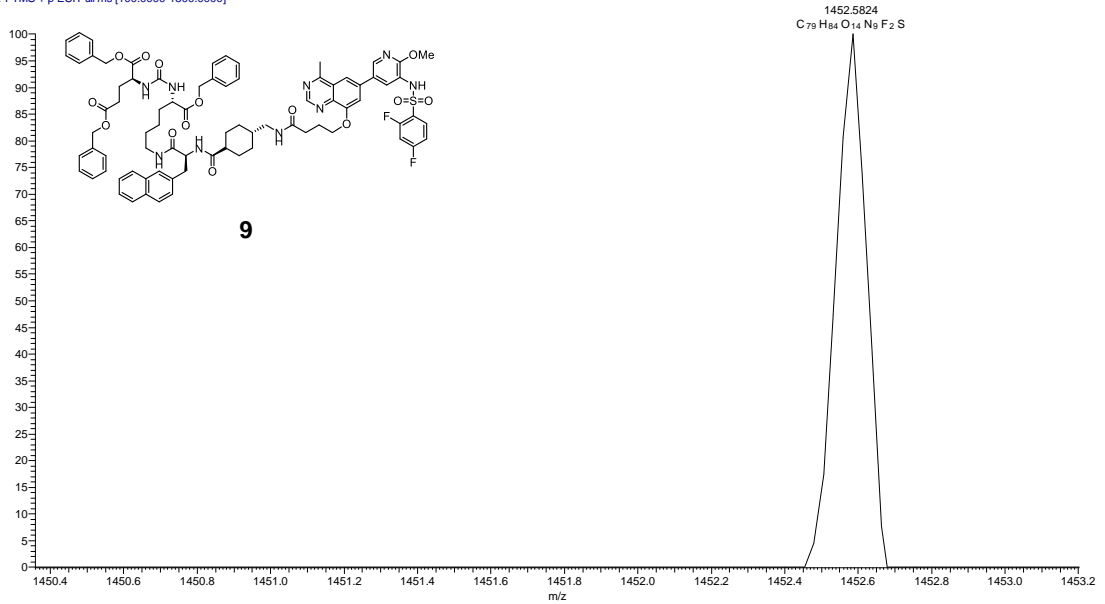

# Compound 1

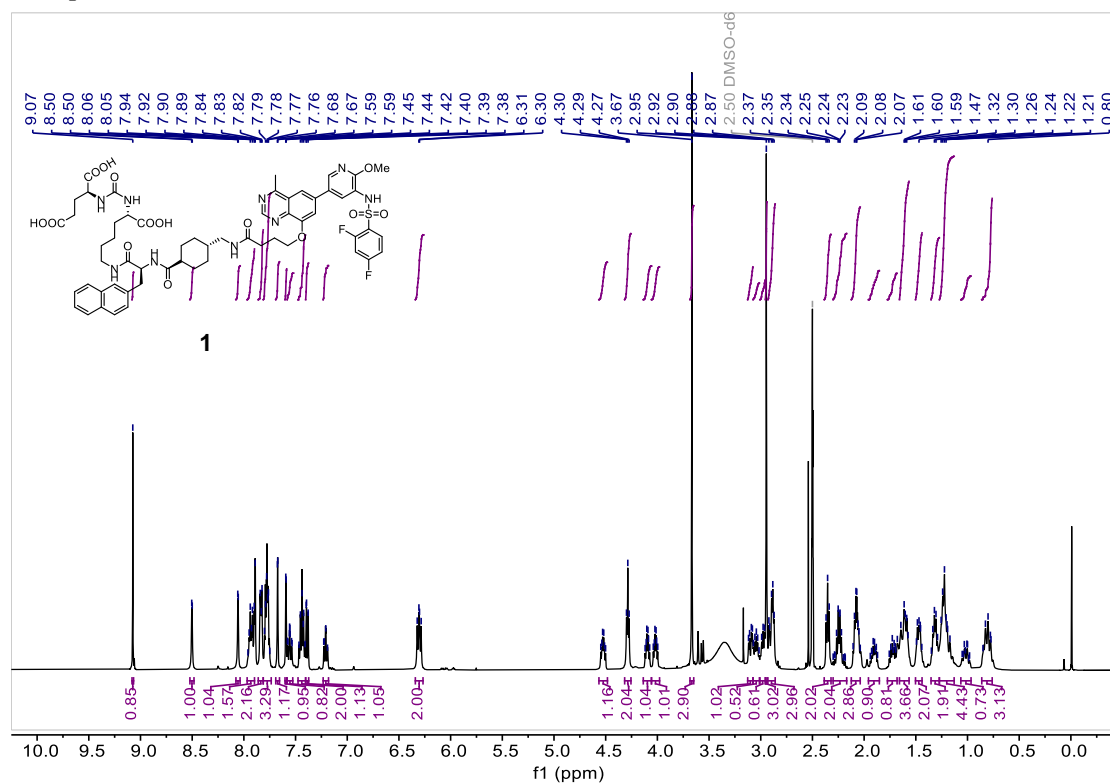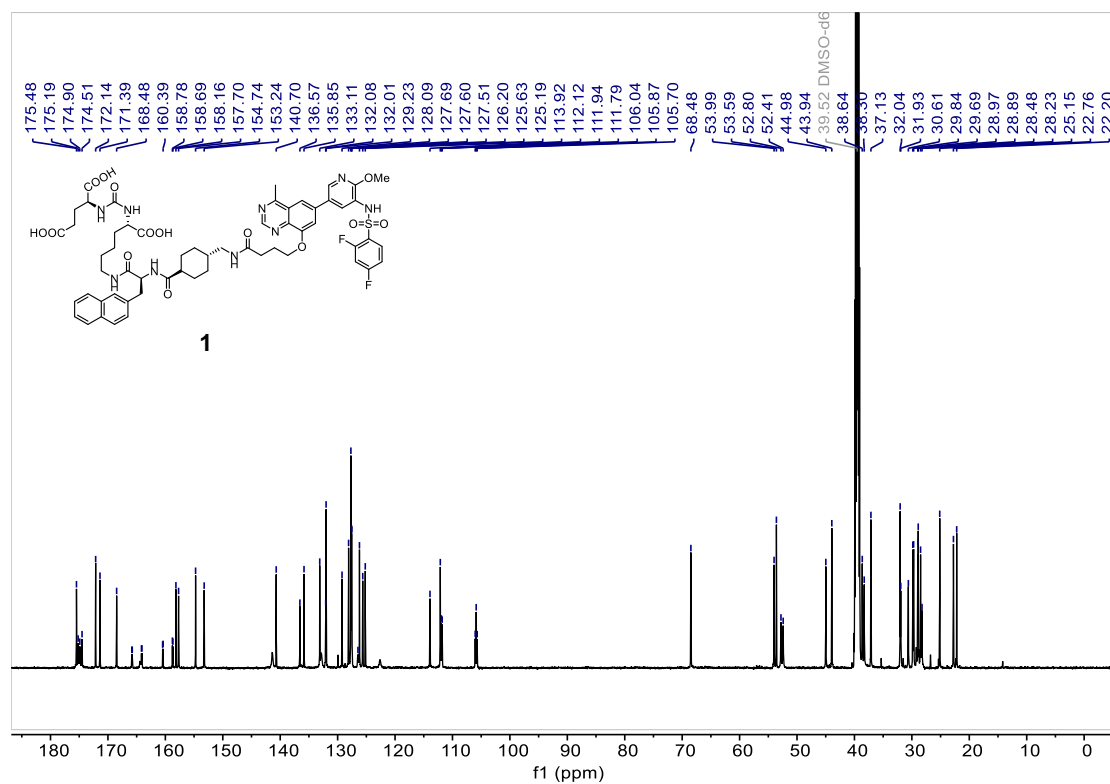

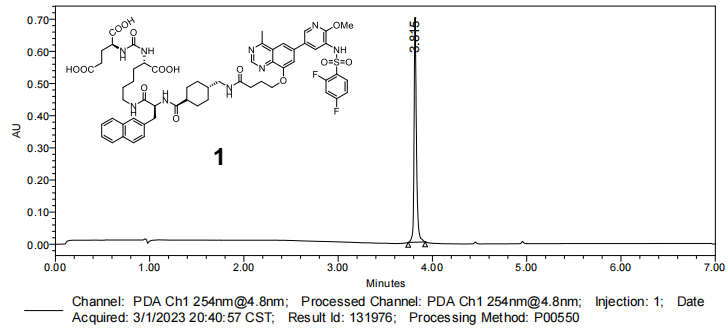

**Peak Name:**

|           | Injection | RT    | Area    | % Area |
|-----------|-----------|-------|---------|--------|
| 1         | 1         | 3.815 | 1217154 | 100.00 |
| Mean      |           | 3.815 |         |        |
| Std. Dev. |           |       |         |        |
| % RSD     |           |       |         |        |

P05-4 #1026-1054 RT: 4.53-4.71 AV: 29 NL: 1.92E4  
T: FTMS + p ESI Full ms [100.0000-1500.0000]

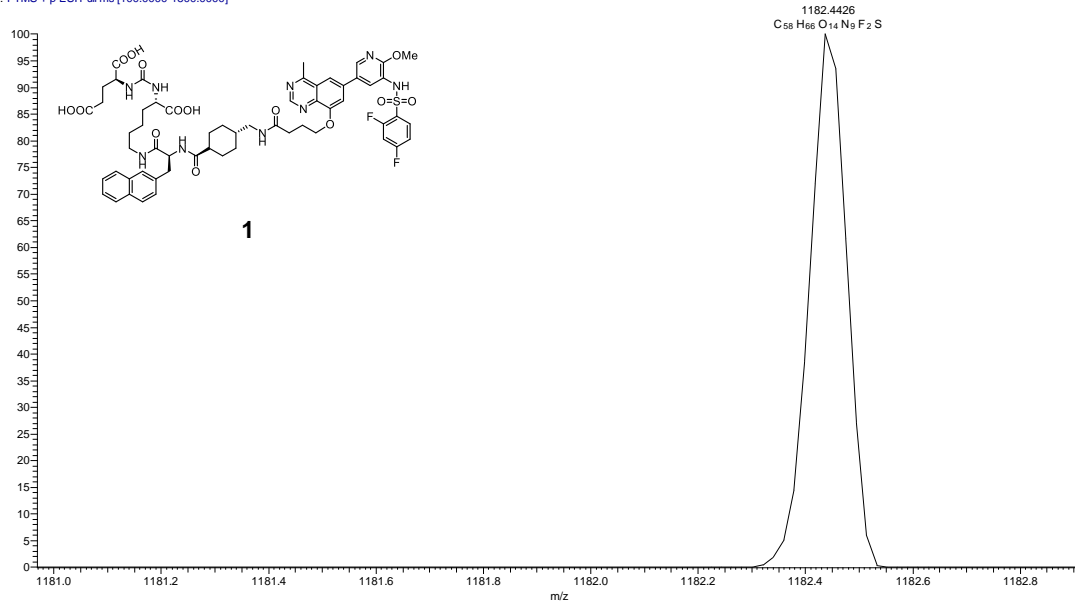

Supplement: d4md00246f1.pdf [file d4md00246f1.pdf]
